# Supplementary material
Source: PubMed Central journal article supplement (PMC9529177)

## Supplemental Material Table of Contents

**Table S1.** Number of patients with missing baseline covariates

**Table S2.** Characteristics of hurricanes that brought hurricane-force winds to one or more study counties

**Table S3.** Multiplicative effect modification terms for the association of hurricanes and mortality by subgroup

**Table S4.** Multiplicative effect modification terms for the association of hurricanes and mortality by state of residence

**Table S5.** Associations of hurricane exposure and mortality across varied post-storm mortality periods among dialysis-dependent patients in the United States from 1997 to 2017

**Table S6.** Characteristics of tropical storms or hurricanes that brought gale-force or higher winds to one or more study counties

**Table S7.** Associations of tropical storm/hurricane exposure and mortality across varied post-storm mortality periods among dialysis-dependent patients in the United States Renal Data Systems population from 1997 to 2017

**Figure S1.** Schematic of time-varying hurricane exposure and 30-day mortality with examples to illustrate exposure and outcome

**Figure S2.** Adjusted survival of dialysis-dependent patients in the United States living in a county with a hurricane exposure from 1997 to 2017, delineated by county among counties with the 25<sup>th</sup> to 75<sup>th</sup> percentile adjusted survival

**Figure S3.** Forest plot demonstrating the associations of hurricane exposure and mortality in dialysis-dependent patients in the United States from 1997 to 2017, stratified by state

**Figure S4.** Map of the number of patient-tropical storm/hurricanes experienced by dialysis-dependent patients in the United States by county from 1997 to 2017. Tropical storm/hurricane exposure is defined by exposure to a tropical cyclone with local peak wind speeds of  $\geq 34$  knots in the county of residence

**Figure S5.** Tropical storm/hurricane-associated mortality hazard ratios across varying post-storm mortality periods

**Table S1.** Number of patients with missing baseline covariates

| <b>Characteristic</b>               | <b>Number missing</b> |
|-------------------------------------|-----------------------|
| Age                                 | 0                     |
| Female                              | 25                    |
| Race/ethnicity                      | 0                     |
| Year of dialysis initiation         | 0                     |
| Education college or above          | 5198                  |
| Percent below federal poverty level | 5263                  |
| Monthly housing cost                | 5290                  |

**Table S2.** Characteristics of hurricanes that brought hurricane-force winds to one or more study counties

| Hurricane <sup>a</sup> | Year | Counties exposed, n <sup>b</sup> | Percent of exposed patients who died within 30 days of hurricane | Maximum sustained wind speed (knots), mean (range) <sup>c</sup> | Cumulative precipitation (mm), mean (range) <sup>c,d</sup> |
|------------------------|------|----------------------------------|------------------------------------------------------------------|-----------------------------------------------------------------|------------------------------------------------------------|
| Bonnie                 | 1998 | 10                               | 3.4                                                              | 79.2 (64.3-93.1)                                                | 129.9 (84.1-166.0)                                         |
| Earl                   | 1998 | 1                                | 0.0                                                              | 64.8 (64.8-64.8)                                                | 211.7 (211.7-211.7)                                        |
| Georges                | 1998 | 5                                | 1.9                                                              | 73.7 (68.5-83.3)                                                | 138.3 (87.9-165.4)                                         |
| Bret                   | 1999 | 4                                | 5.0                                                              | 68.6 (65.3-91.7)                                                | 153.7 (110.8-196.4)                                        |
| Floyd                  | 1999 | 10                               | 1.6                                                              | 71.2 (64.3-75.8)                                                | 134.4 (79.2-159.4)                                         |
| Irene                  | 1999 | 2                                | 2.9                                                              | 64.7 (64.4-65.0)                                                | 201.3 (158.6-233.6)                                        |
| Lili                   | 2002 | 3                                | 3.0                                                              | 67.9 (65.5-69.9)                                                | 133.8 (125.4-144.9)                                        |
| Claudette              | 2003 | 2                                | 5.0                                                              | 65.8 (64.3-66.2)                                                | 88.1 (73.1-91.9)                                           |
| Isabel                 | 2003 | 11                               | 1.2                                                              | 68.0 (64.1-81.7)                                                | 117.2 (72.0-149.0)                                         |
| Charley                | 2004 | 12                               | 1.8                                                              | 76.7 (67.1-107.3)                                               | 116.1 (79.4-146.7)                                         |
| Frances                | 2004 | 5                                | 1.3                                                              | 69.5 (64.8-87.4)                                                | 122.9 (93.9-194.7)                                         |
| Ivan                   | 2004 | 5                                | 1.5                                                              | 77.8 (67.9-85.4)                                                | 121.6 (114.1-158.2)                                        |
| Jeanne                 | 2004 | 8                                | 3.3                                                              | 72.5 (66.2-98.1)                                                | 135.5 (101.4-161.9)                                        |
| Dennis                 | 2005 | 4                                | 2.5                                                              | 80.8 (74.6-87.0)                                                | 121.5 (116.2-137.4)                                        |
| Katrina                | 2005 | 17                               | 1.9                                                              | 69.7 (64.4-97.0)                                                | 138.0 (80.9-197.2)                                         |
| Rita                   | 2005 | 5                                | 2.9                                                              | 75.7 (67.3-82.0)                                                | 206.8 (154.9-243.6)                                        |
| Wilma                  | 2005 | 4                                | 2.2                                                              | 73.0 (64.8-79.5)                                                | 69.1 (53.5-116.7)                                          |
| Humberto               | 2007 | 2                                | 1.1                                                              | 67.0 (64.3-67.6)                                                | 118.7 (116.3-130.2)                                        |
| Dolly                  | 2008 | 1                                | 0.0                                                              | 64.3 (64.3-64.3)                                                | 149.7 (149.7-149.7)                                        |
| Gustav                 | 2008 | 12                               | 1.6                                                              | 71.3 (64.7-87.1)                                                | 178.0 (131.2-240.3)                                        |
| Ike                    | 2008 | 9                                | 1.9                                                              | 73.2 (65.5-88.8)                                                | 203.6 (104.5-235.8)                                        |
| Irene                  | 2011 | 3                                | 3.3                                                              | 67.1 (64.9-68.5)                                                | 253.9 (239.3-310.9)                                        |
| Sandy <sup>e</sup>     | 2012 | 1                                | 3.5                                                              | 64.5 (64.5-64.5)                                                |                                                            |
| Arthur <sup>e</sup>    | 2014 | 2                                | 1.2                                                              | 74.9 (69.3-76.2)                                                |                                                            |
| Matthew <sup>e</sup>   | 2016 | 1                                | 1.2                                                              | 68.0 (68.0-68.0)                                                |                                                            |
| Harvey <sup>e</sup>    | 2017 | 8                                | 1.2                                                              | 74.7 (68.5-103.2)                                               |                                                            |
| Irma <sup>e</sup>      | 2017 | 9                                | 1.5                                                              | 73.3 (65.6-91.9)                                                |                                                            |

<sup>a</sup> Hurricane exposure is defined by exposure to a tropical cyclone that brought local peak wind speeds of  $\geq 64$  knots in the county of residence.

<sup>b</sup> Includes counties in which a dialysis-dependent patient lived at the time hurricane exposure

<sup>c</sup> Values in this column represent the mean and range across counties in which a dialysis-dependent patient lived at the time hurricane exposure.

<sup>d</sup> Cumulative precipitation is a sum of daily precipitation from 5 days before to 3 days after the hurricane.

<sup>e</sup> Precipitation data are unavailable for the hurricane.

**Table S3.** Multiplicative effect modification terms for the association of hurricanes and mortality by subgroup

| <b>Covariate</b>                      | <b>Effect modification term<br/>hazard ratio, 95% confidence<br/>interval</b> | <b>P value for effect<br/>modification</b> |
|---------------------------------------|-------------------------------------------------------------------------------|--------------------------------------------|
| Sex                                   |                                                                               |                                            |
| Male                                  | Reference                                                                     |                                            |
| Female                                | 0.90 (0.78 to 1.04)                                                           | 0.17                                       |
| Race and ethnicity                    |                                                                               |                                            |
| Hispanic                              | 1.00 (0.81 to 1.24)                                                           | 0.97                                       |
| Non-Hispanic Black                    | 1.17 (1.00 to 1.37)                                                           | 0.05                                       |
| Non-Hispanic White                    | Reference                                                                     |                                            |
| Other                                 | 1.19 (0.68 to 2.08)                                                           | 0.53                                       |
| Year of dialysis initiation           |                                                                               |                                            |
| 1997-2003                             | Reference                                                                     |                                            |
| 2004-2010                             | 0.89 (0.76 to 1.04)                                                           | 0.13                                       |
| 2011-2017                             | 0.99 (0.76 to 1.29)                                                           | 0.92                                       |
| Cause of ESKD                         |                                                                               |                                            |
| Diabetes                              | Reference                                                                     |                                            |
| Hypertension                          | 1.01 (0.86 to 1.19)                                                           | 0.88                                       |
| Glomerulonephritis                    | 1.06 (0.78 to 1.43)                                                           | 0.72                                       |
| Other                                 | 1.03 (0.83 to 1.28)                                                           | 0.77                                       |
| Dialysis modality                     |                                                                               |                                            |
| In-center hemodialysis                | Reference                                                                     |                                            |
| Combined home modalities <sup>a</sup> | 1.05 (0.79 to 1.39)                                                           | 0.74                                       |
| Percent below federal poverty level   |                                                                               |                                            |
| Quartile 1                            | Reference                                                                     |                                            |
| Quartile 2                            | 1.03 (0.84 to 1.27)                                                           | 0.75                                       |
| Quartile 3                            | 1.08 (0.88 to 1.32)                                                           | 0.45                                       |
| Quartile 4                            | 1.12 (0.92 to 1.37)                                                           | 0.25                                       |

<sup>a</sup> Combined home hemodialysis and peritoneal dialysis. Unknown dialysis modality excluded from effect modification analysis due to insufficient outcomes. ESKD, end stage kidney disease.

**Table S4.** Multiplicative effect modification terms for the association of hurricanes and mortality by state of residence.

| <b>State<sup>a</sup></b> | <b>Effect modification term<br/>hazard ratio, 95% confidence<br/>interval</b> | <b>P value for effect<br/>modification</b> |
|--------------------------|-------------------------------------------------------------------------------|--------------------------------------------|
| Alabama                  | Reference                                                                     |                                            |
| Florida                  | 1.26 (0.67 to 2.36)                                                           | 0.47                                       |
| Louisiana                | 0.88 (0.44 to 1.73)                                                           | 0.70                                       |
| Mississippi              | 1.33 (0.62 to 2.88)                                                           | 0.46                                       |
| New Jersey               | 1.78 (0.85 to 3.74)                                                           | 0.13                                       |
| North Carolina           | 1.37 (0.65 to 2.88)                                                           | 0.41                                       |
| South Carolina           | 1.23 (0.50 to 3.03)                                                           | 0.66                                       |
| Texas                    | 1.24 (0.65 to 2.35)                                                           | 0.52                                       |

<sup>a</sup> Georgia and Virginia were excluded from effect modification analysis due to insufficient outcomes.

**Table S5.** Associations of hurricane exposure and mortality across varied post-storm mortality periods among dialysis-dependent patients in the United States Renal Data Systems population from 1997 to 2017

| <b>Post-storm exposure period</b> | <b>Demographic and socioeconomic status-adjusted model<sup>a</sup></b> |                |
|-----------------------------------|------------------------------------------------------------------------|----------------|
|                                   | <b>Hazard ratio (95% confidence interval)</b>                          | <b>P value</b> |
| 1 day                             | 2.02 (1.51 to 2.69)                                                    | <0.001         |
| 3 days                            | 1.59 (1.31 to 1.92)                                                    | <0.001         |
| 7 days                            | 1.32 (1.15 to 1.51)                                                    | <0.001         |
| 14 days                           | 1.17 (1.06 to 1.30)                                                    | 0.002          |
| 30 days                           | 1.13 (1.05 to 1.22)                                                    | <0.001         |
| 60 days                           | 1.04 (0.99 to 1.10)                                                    | 0.16           |
| 90 days                           | 1.03 (0.98 to 1.07)                                                    | 0.28           |

<sup>a</sup> Adjusted for age, sex, race and ethnicity, year of dialysis initiation, educational attainment, poverty level, and monthly housing cost

**Table S6.** Characteristics of tropical storms or hurricanes that brought gale-force or higher winds to one or more study counties

| Tropical storm/hurricane <sup>a</sup> | Year | Counties exposed, n <sup>b</sup> | Percent of exposed patients who died within 30 days of tropical storm/hurricane | Maximum sustained wind speed (knots), mean (range) <sup>c</sup> | Cumulative precipitation (mm), mean (range) <sup>c,d</sup> |
|---------------------------------------|------|----------------------------------|---------------------------------------------------------------------------------|-----------------------------------------------------------------|------------------------------------------------------------|
| Danny                                 | 1997 | 53                               | 2.1                                                                             | 44.3 (34.3-58.4)                                                | 73.9 (31.1-175.9)                                          |
| Bonnie                                | 1998 | 80                               | 0.7                                                                             | 46.7 (34.1-93.1)                                                | 56.4 (1.2-166.0)                                           |
| Charley                               | 1998 | 2                                | 0.0                                                                             | 36.2 (36.2-36.5)                                                | 113.7 (110.6-125.5)                                        |
| Earl                                  | 1998 | 140                              | 1.9                                                                             | 41.2 (34.4-64.8)                                                | 80.3 (30.7-214.1)                                          |
| Frances                               | 1998 | 15                               | 1.5                                                                             | 36.6 (34.0-43.6)                                                | 70.1 (30.2-156.3)                                          |
| Georges                               | 1998 | 49                               | 1.9                                                                             | 51.2 (34.8-83.3)                                                | 72.3 (4.2-264.0)                                           |
| Mitch                                 | 1998 | 10                               | 2.5                                                                             | 42.0 (36.1-51.5)                                                | 81.0 (65.6-109.5)                                          |
| Bret                                  | 1999 | 20                               | 1.7                                                                             | 52.8 (34.2-91.7)                                                | 107.5 (34.3-196.4)                                         |
| Dennis                                | 1999 | 28                               | 1.3                                                                             | 40.2 (34.6-54.5)                                                | 153.7 (46.1-262.1)                                         |
| Floyd                                 | 1999 | 161                              | 2.1                                                                             | 43.1 (34.1-75.8)                                                | 138.6 (32.9-222.8)                                         |
| Harvey                                | 1999 | 3                                | 2.0                                                                             | 40.5 (35.3-44.7)                                                | 108.4 (102.0-139.2)                                        |
| Irene                                 | 1999 | 29                               | 2.4                                                                             | 55.3 (34.8-65.0)                                                | 179.2 (18.4-242.6)                                         |
| Gordon                                | 2000 | 16                               | 2.1                                                                             | 37.7 (34.3-46.8)                                                | 93.2 (56.7-121.3)                                          |
| Helene                                | 2000 | 17                               | 1.6                                                                             | 35.6 (34.0-39.9)                                                | 112.6 (70.5-166.6)                                         |
| Allison                               | 2001 | 20                               | 1.8                                                                             | 36.9 (34.2-41.3)                                                | 226.3 (46.0-387.7)                                         |
| Barry                                 | 2001 | 27                               | 2.2                                                                             | 41.8 (34.4-51.8)                                                | 76.1 (39.6-151.3)                                          |
| Gabrielle                             | 2001 | 21                               | 2.2                                                                             | 41.0 (35.5-54.9)                                                | 149.9 (108.7-186.0)                                        |
| Fay                                   | 2002 | 4                                | 4.0                                                                             | 36.5 (34.7-45.2)                                                | 134.6 (85.5-153.2)                                         |
| Gustav                                | 2002 | 2                                | 3.7                                                                             | 36.2 (35.6-36.9)                                                | 43.3 (41.6-44.6)                                           |
| Hanna                                 | 2002 | 7                                | 1.7                                                                             | 39.5 (35.7-42.4)                                                | 40.2 (20.9-50.5)                                           |
| Isidore                               | 2002 | 36                               | 1.5                                                                             | 43.1 (34.3-50.5)                                                | 262.4 (80.4-348.4)                                         |
| Lili                                  | 2002 | 44                               | 2.2                                                                             | 44.6 (34.1-69.9)                                                | 90.0 (13.6-144.9)                                          |
| Bill                                  | 2003 | 18                               | 1.9                                                                             | 42.5 (34.2-45.3)                                                | 209.4 (84.8-278.8)                                         |
| Claudette                             | 2003 | 43                               | 1.8                                                                             | 38.7 (34.1-66.2)                                                | 44.1 (11.3-137.9)                                          |
| Erika                                 | 2003 | 3                                | 1.0                                                                             | 42.7 (38.8-47.9)                                                | 50.0 (45.9-53.2)                                           |
| Grace                                 | 2003 | 1                                | 10.7                                                                            | 34.7 (34.7-34.7)                                                | 176.2 (176.2-176.2)                                        |



|           |      |     |     |                   |                    |
|-----------|------|-----|-----|-------------------|--------------------|
| Isabel    | 2003 | 157 | 1.6 | 45.2 (34.3-81.7)  | 89.8 (37.9-198.1)  |
| Alex      | 2004 | 23  | 0.4 | 39.6 (34.9-51.7)  | 77.2 (54.0-118.9)  |
| Charley   | 2004 | 84  | 1.3 | 50.7 (34.2-107.3) | 94.7 (47.3-192.0)  |
| Frances   | 2004 | 56  | 1.4 | 48.0 (34.1-87.4)  | 151.5 (47.3-313.3) |
| Gaston    | 2004 | 34  | 1.6 | 41.4 (34.0-59.3)  | 81.4 (10.7-204.7)  |
| Ivan      | 2004 | 56  | 1.8 | 52.2 (34.1-85.4)  | 108.2 (15.0-188.6) |
| Jeanne    | 2004 | 48  | 2.2 | 50.5 (34.0-98.1)  | 114.2 (37.9-191.9) |
| Arlene    | 2005 | 4   | 1.8 | 38.8 (36.7-43.5)  | 109.0 (87.5-116.9) |
| Cindy     | 2005 | 19  | 1.8 | 41.7 (34.2-54.3)  | 154.2 (46.9-207.6) |
| Dennis    | 2005 | 44  | 1.8 | 51.8 (34.3-87.0)  | 145.9 (85.3-237.8) |
| Emily     | 2005 | 4   | 1.6 | 42.6 (37.1-45.3)  | 124.2 (80.6-149.2) |
| Katrina   | 2005 | 96  | 1.8 | 57.8 (34.7-97.0)  | 108.4 (16.3-197.2) |
| Ophelia   | 2005 | 26  | 1.5 | 39.5 (34.4-54.6)  | 76.9 (16.1-185.0)  |
| Rita      | 2005 | 44  | 1.8 | 42.8 (34.3-82.0)  | 77.6 (9.7-284.6)   |
| Tammy     | 2005 | 11  | 2.2 | 38.2 (34.3-39.3)  | 138.0 (91.8-284.9) |
| Wilma     | 2005 | 18  | 2.1 | 65.4 (34.2-79.5)  | 95.8 (53.5-224.0)  |
| Alberto   | 2006 | 19  | 1.5 | 34.9 (34.1-37.2)  | 94.2 (50.2-136.0)  |
| Ernesto   | 2006 | 92  | 1.5 | 36.4 (34.2-47.0)  | 148.4 (44.9-246.8) |
| Barry     | 2007 | 14  | 1.4 | 36.5 (34.2-37.7)  | 74.7 (30.9-122.9)  |
| Erin      | 2007 | 26  | 1.8 | 36.8 (34.6-47.7)  | 129.6 (15.4-189.7) |
| Gabrielle | 2007 | 10  | 1.1 | 37.7 (34.9-42.4)  | 26.4 (2.5-88.4)    |
| Humberto  | 2007 | 38  | 1.7 | 45.7 (34.1-67.6)  | 40.8 (4.1-137.2)   |
| Dolly     | 2008 | 14  | 1.6 | 49.1 (34.2-64.3)  | 125.1 (30.4-184.3) |
| Edouard   | 2008 | 16  | 1.6 | 37.3 (34.5-50.6)  | 79.7 (23.3-89.3)   |
| Fay       | 2008 | 61  | 1.7 | 41.5 (34.1-58.7)  | 214.4 (54.8-402.7) |
| Gustav    | 2008 | 59  | 1.7 | 54.9 (34.1-87.1)  | 169.9 (57.0-287.6) |
| Hanna     | 2008 | 144 | 1.5 | 38.6 (34.0-55.2)  | 93.1 (19.8-150.9)  |
| Ike       | 2008 | 242 | 1.8 | 48.7 (34.1-88.8)  | 111.3 (11.7-235.8) |
| Kyle      | 2008 | 1   | 4.0 | 35.3 (35.3-35.3)  | 88.2 (88.2-88.2)   |
| Claudette | 2009 | 6   | 2.1 | 35.4 (34.1-37.8)  | 86.1 (66.4-138.3)  |
| Hermine   | 2010 | 22  | 1.5 | 39.3 (34.3-51.8)  | 132.1 (56.5-221.9) |

|                      |      |     |     |                   |                    |
|----------------------|------|-----|-----|-------------------|--------------------|
| Irene                | 2011 | 157 | 1.6 | 45.4 (34.0-68.5)  | 167.1 (57.3-310.9) |
| Lee                  | 2011 | 34  | 1.4 | 36.7 (34.2-39.9)  | 237.9 (61.4-312.8) |
| Beryl <sup>e</sup>   | 2012 | 27  | 1.3 | 38.3 (34.0-51.0)  |                    |
| Isaac <sup>e</sup>   | 2012 | 53  | 1.4 | 48.4 (34.5-63.3)  |                    |
| Sandy <sup>e</sup>   | 2012 | 116 | 1.6 | 46.6 (34.0-64.5)  |                    |
| Andrea <sup>e</sup>  | 2013 | 81  | 1.3 | 37.9 (34.0-40.5)  |                    |
| Arthur <sup>e</sup>  | 2014 | 55  | 1.2 | 41.5 (34.3-76.2)  |                    |
| Ana <sup>e</sup>     | 2015 | 5   | 1.2 | 36.6 (34.3-38.7)  |                    |
| Bill <sup>e</sup>    | 2015 | 14  | 1.2 | 40.8 (34.1-49.9)  |                    |
| Colin <sup>e</sup>   | 2016 | 20  | 1.7 | 41.4 (34.6-44.9)  |                    |
| Hermine <sup>e</sup> | 2016 | 130 | 1.2 | 44.0 (34.0-63.1)  |                    |
| Julia <sup>e</sup>   | 2016 | 20  | 0.9 | 39.1 (34.5-44.1)  |                    |
| Matthew <sup>e</sup> | 2016 | 94  | 1.4 | 45.8 (34.0-68.0)  |                    |
| Cindy <sup>e</sup>   | 2017 | 11  | 1.4 | 39.7 (35.8-44.1)  |                    |
| Emily <sup>e</sup>   | 2017 | 5   | 1.5 | 36.1 (34.9-37.4)  |                    |
| Harvey <sup>e</sup>  | 2017 | 45  | 1.2 | 43.0 (34.1-103.2) |                    |
| Irma <sup>e</sup>    | 2017 | 72  | 1.6 | 47.8 (34.1-91.9)  |                    |
| Nate <sup>e</sup>    | 2017 | 33  | 1.4 | 43.8 (34.1-60.6)  |                    |

<sup>a</sup> Tropical storm/hurricane exposure is defined by exposure to a tropical cyclone with local peak wind speeds of  $\geq 34$  knots in the county of residence.

<sup>b</sup> Includes counties in which a dialysis-dependent patient lived at the time tropical storm/hurricane exposure

<sup>c</sup> Values in this column represent the mean and range across counties in which a dialysis-dependent patient lived at the time tropical storm/hurricane exposure.

<sup>d</sup> Cumulative precipitation is a sum of daily precipitation from 5 days before to 3 days after the tropical storm/hurricane

<sup>e</sup> Precipitation data are unavailable for the tropical storm/hurricane

**Table S7.** Associations of tropical storm/hurricane exposure and mortality across varied post-storm mortality periods among dialysis-dependent patients in the United States Renal Data Systems population from 1997 to 2017

| Post-storm exposure period | Demographic and socioeconomic status-adjusted model <sup>a</sup> |         |
|----------------------------|------------------------------------------------------------------|---------|
|                            | Hazard ratio (95% confidence interval)                           | P value |
| 1 day                      | 2.14 (1.99 to 2.31)                                              | <0.001  |
| 3 days                     | 1.41 (1.34 to 1.49)                                              | <0.001  |
| 7 days                     | 1.16 (1.12 to 1.21)                                              | <0.001  |
| 14 days                    | 1.07 (1.04 to 1.10)                                              | <0.001  |
| 30 days                    | 1.02 (1.00 to 1.05)                                              | 0.02    |
| 60 days                    | 1.01 (0.99 to 1.02)                                              | 0.31    |
| 90 days                    | 1.02 (1.01 to 1.03)                                              | 0.001   |

<sup>a</sup> Adjusted for age, sex, race and ethnicity, year of dialysis initiation, educational attainment, poverty level, and monthly housing cost

**Figure S1.** Schematic of time-varying hurricane exposure and 30-day mortality with examples to illustrate exposure and outcome

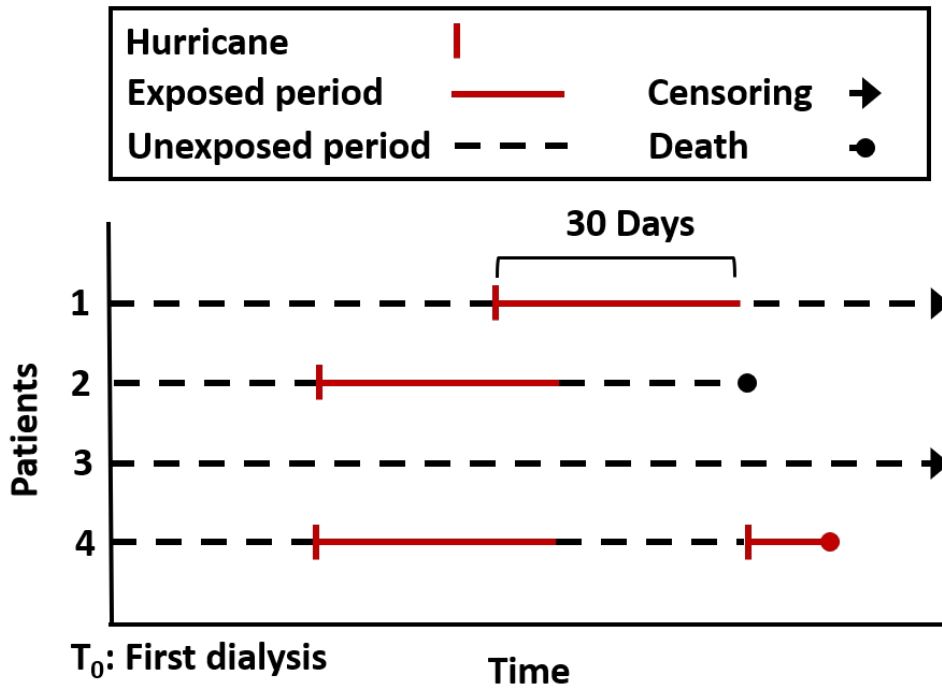

Patient 1 experiences a hurricane and is censored following the 30-day mortality period. Patient 2 experiences a hurricane and dies following the 30-day mortality period. Patient 3 is unexposed to a hurricane. Patient 4 dies within the 30-day mortality period following their second hurricane exposure.

**Figure S2.** Adjusted survival of dialysis-dependent patients in the United States living in a county with a hurricane exposure from 1997 to 2017, delineated by county among counties with the 25<sup>th</sup> to 75<sup>th</sup> percentile adjusted survival

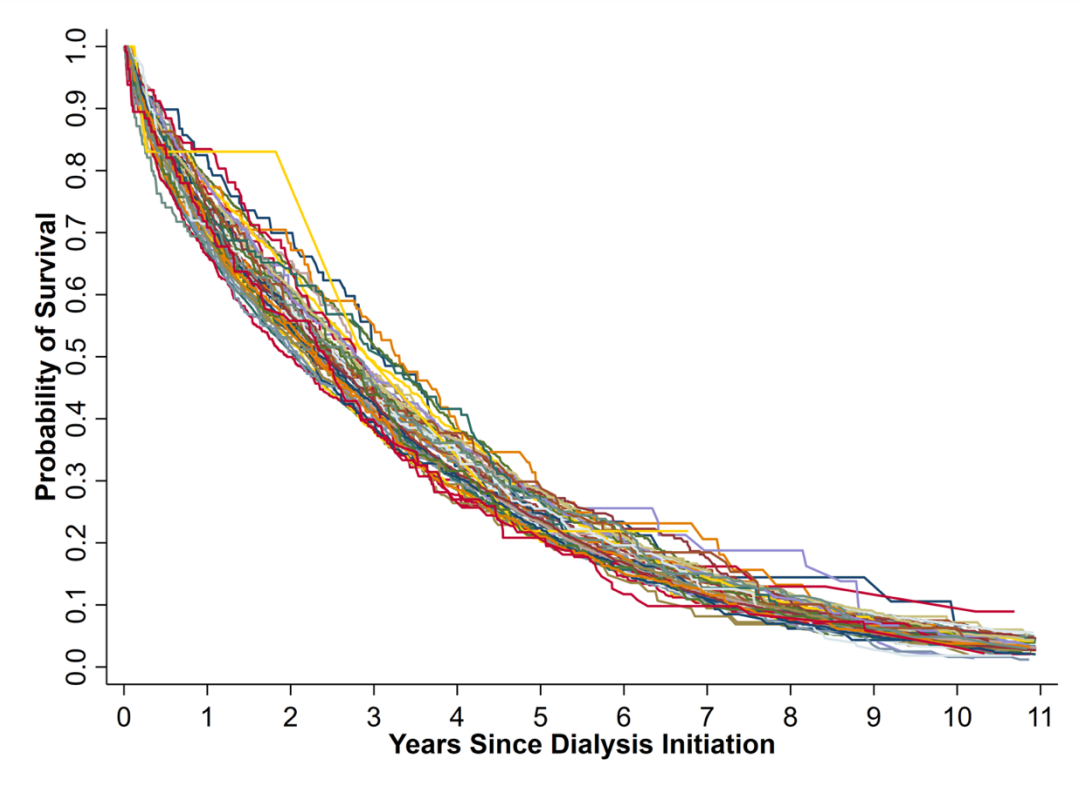

**Figure S3.** Forest plot demonstrating the associations of hurricane exposure and mortality in dialysis-dependent patients in the United States from 1997 to 2017, stratified by state

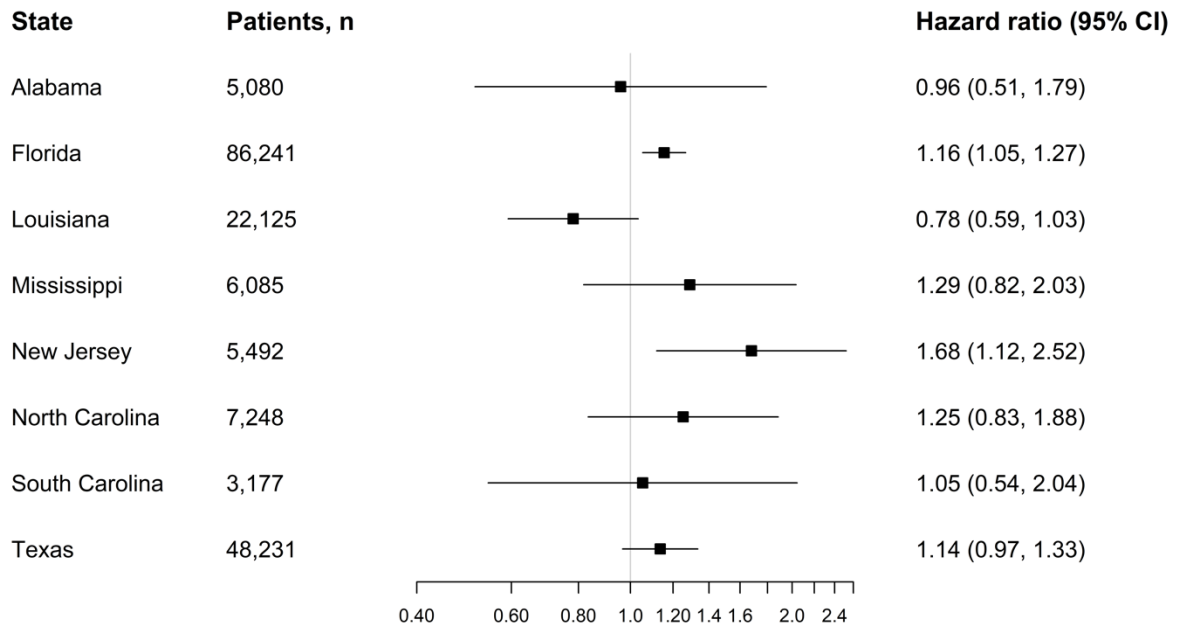

Note: Georgia and Virginia were excluded from the forest plot due to insufficient outcomes

**Figure S4.** Map of the number of patient-tropical storm/hurricanes experienced by dialysis-dependent patients in the United States by county from 1997 to 2017. Tropical storm/hurricane exposure is defined by exposure to a tropical cyclone with local peak wind speeds of  $\geq 34$  knots in the county of residence.

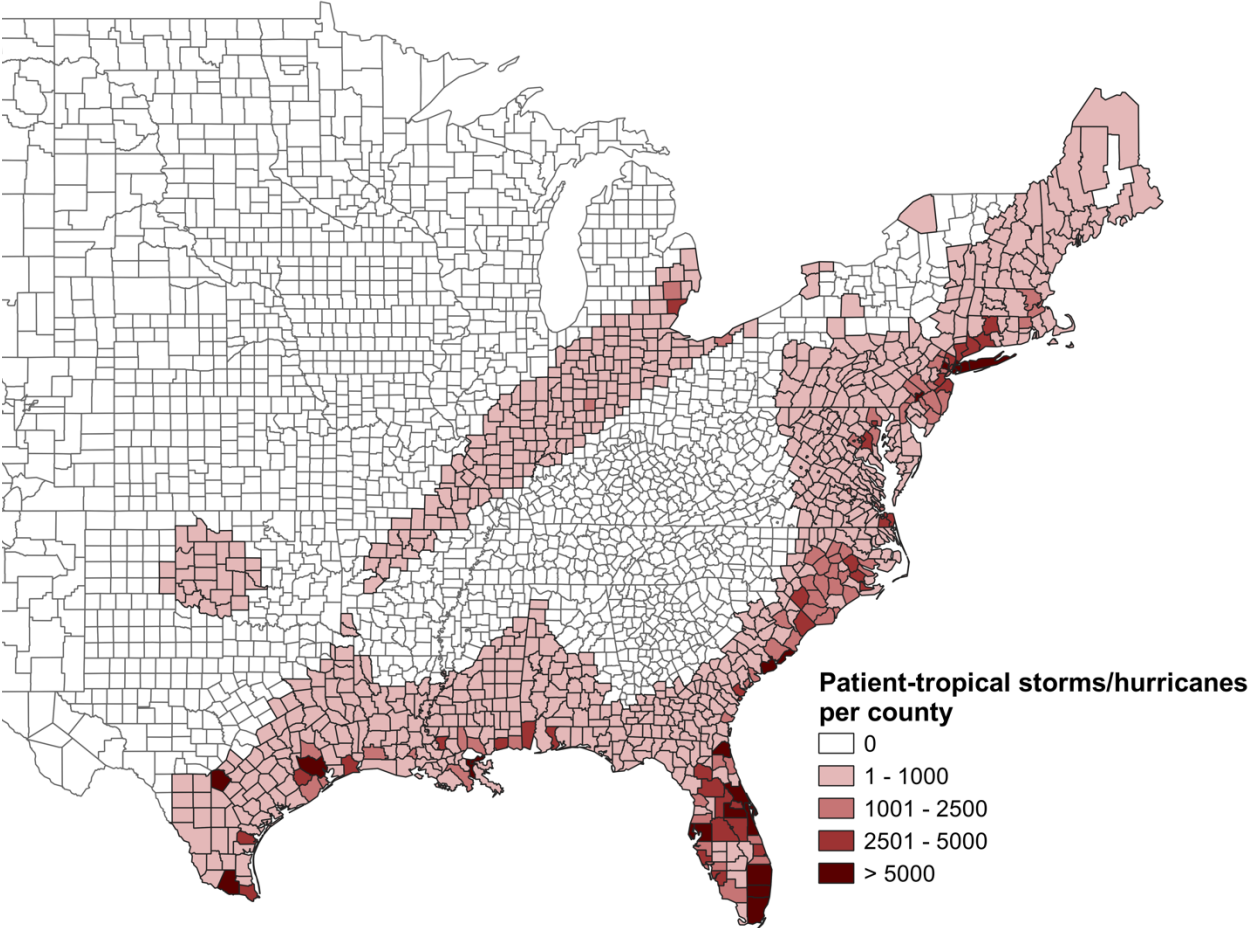

**Figure S5.** Tropical storm/hurricane-associated mortality hazard ratios across varying post-storm mortality periods

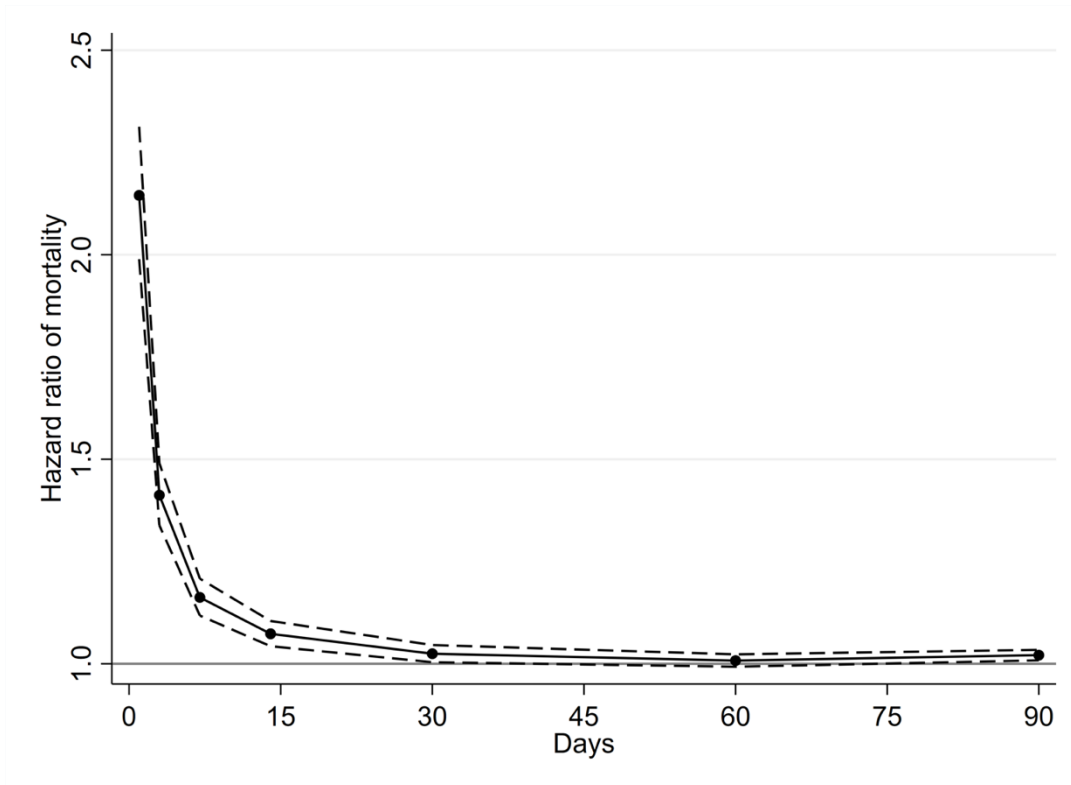

Supplement: ASN.2021111520SupplementaryData1.pdf [file ASN.2021111520SupplementaryData1.pdf]
